# Supplementary material
Source: PubMed Central journal article supplement (PMC5452828)
Supplement: AEM.00402-17_zam999117892s1.pdf [file AEM.00402-17_zam999117892s1.pdf]

## SUPPLEMENTAL MATERIAL

### **An extracellular cell-attached pullulanase confers branched $\alpha$ -glucan utilization in human gut probiotic *Lactobacillus acidophilus***

Marie S. Møller,<sup>a</sup> Yong Jun Goh,<sup>b</sup> Kasper Bøwig Rasmussen,<sup>a\*</sup> Wojciech Cypryk,<sup>a\*</sup> Hasan Ufuk Celebioglu,<sup>a</sup> Todd R. Klaenhammer,<sup>b</sup> Birte Svensson,<sup>a</sup> Maher Abou Hachem<sup>a#</sup>

Department of Biotechnology and Biomedicine, Technical University of Denmark, Kgs. Lyngby, Denmark<sup>a</sup>;  
Department of Food, Bioprocessing and Nutrition Sciences, North Carolina State University, Raleigh, North Carolina<sup>b</sup>

#Address correspondence to Maher Abou Hachem, maha@bio.dtu.dk and Yong Jun Goh, yjgoh@ncsu.edu.

\*Present address: Kasper Bøwig Rasmussen, Novo Nordisk A/S, Gentofte, Denmark; Wojciech Cypryk, Department of Bioorganic Chemistry, Polish Academy of Sciences, Lodz, Poland.

**Table S1.** Predicted extracellular enzymes (SignalP (1)) of GH13 from available *Lactobacillus* genomes.

| <b>Genbank accession</b> | <b>Organism</b>                     | <b>GH13 subfamily<sup>a</sup></b> | <b>SLAP domain<sup>b</sup></b> | <b>Isolate origin</b>            |
|--------------------------|-------------------------------------|-----------------------------------|--------------------------------|----------------------------------|
| AAV43522                 | <i>L. acidophilus</i> NCFM          | 14                                | +                              | <b>Human gut</b>                 |
| AJP47013                 | <i>L. acidophilus</i> FSI4          | 14                                | +                              | Yogurt                           |
| AGK94861                 | <i>L. acidophilus</i> La-14         | 14                                | +                              | <b>Human gut</b>                 |
| ADZ06675                 | <i>L. amylovorus</i> 30SC           | 14                                | +                              | <b>Porcine gut</b>               |
| ADQ58495                 | <i>L. amylovorus</i> GRL1112        | 14                                | +                              | <b>Porcine gut</b>               |
| AEA31469                 | <i>L. amylovorus</i> GRL1118        | 14                                | +                              | <b>Porcine ileum</b>             |
| AAC45781                 | <i>L. amylovorus</i> CIP 102989     | 28                                | -                              | Cattle (waste-corn fermentation) |
| AAD45245                 | <i>L. manihotivorans</i> LMG 18010T | 28                                | -                              | Cassava                          |
| AAC45780                 | <i>L. plantarum</i> A6              | 28                                | -                              | Cassava                          |
| BAF93906                 | <i>L. plantarum</i> L137            | 14                                | -                              | Fermented food                   |
| AHX97726                 | <i>L. plantarum</i> S21             | 28                                | -                              | Fermented rice noodles           |

<sup>a</sup>Subfamily classification in the CAZy data base (www.CAZy.org).

<sup>b</sup>The occurrence of a surface layer association protein domain in the enzyme is denoted by “+”

**Table S2.** Comparison of kinetic parameters of pullulanases. Purple, GH13\_13, i.e. enzymes mainly acting on  $\beta$ -limit dextrins; Blue, GH13\_14, i.e. enzymes with activity on  $\beta$ -limit dextrins as well as the polymeric  $\alpha$ -glucans amylopectin and glycogen; Orange, Unclassified/no protein sequence in CAZy. The enzyme from *L. acidophilus* NCFM displays the highest catalytic efficiency for any debranching enzyme owing to an unprecedented low  $K_m$ .

| Organism                                                                                        | pH,<br>temperature | $K_m$<br>$mg\ ml^{-1}$ | $k_{cat}$<br>$s^{-1}$ | $k_{cat}/K_m$<br>$ml\ s^{-1}\ mg^{-1}$ | Reference         |
|-------------------------------------------------------------------------------------------------|--------------------|------------------------|-----------------------|----------------------------------------|-------------------|
| <b>PULLULAN</b>                                                                                 |                    |                        |                       |                                        |                   |
| Barley ( <i>Hordeum vulgare</i> )                                                               | 5.5, 37°C          | 0.081±0.003            | 61±13                 | 753                                    | (2)               |
| <i>Klebsiella pneumoniae</i> ,                                                                  | 5.0, 40°C          | 0.017                  | 103.3                 | 6076                                   | (3)               |
| <i>Klebsiella pneumoniae</i>                                                                    | 5.4, 37°C          | 0.617                  | 116                   | 188                                    | (4)               |
| Rice ( <i>Oryza sativa</i> L. <i>japonica</i> )                                                 | 6.0, 37°C          | 0.625                  | 23.1                  | 37.0                                   | (5)               |
| Spinach ( <i>Spinacia oleracea</i> )                                                            | 6.0, 37°C          | 0.78/0.70              |                       |                                        | (6, 7)            |
| <i>Anaerobranca gottschalkii</i>                                                                | 8, 60°C            | 0.75                   |                       |                                        | (8)               |
| <i>Bacillus acidopullulyticus</i>                                                               | 5.0, 70°C          | 4.0                    |                       |                                        | (9)               |
| <i>Bacillus deramificans</i>                                                                    | 4.5, 60°C          | 0.70±0.02              | 1900.4±103.5          | 2712.9±121.6                           | (10)              |
| <i>Bacillus subtilis</i> strain 168                                                             | 5.4, 37°C          | 1.284                  | 97                    | 75.5                                   | (4)               |
| <i>Exiguobacterium</i> sp. SH3                                                                  | 7.0, 37°C          | 0.069                  |                       |                                        | (11)              |
| <i>Fervidobacterium pennavorans</i>                                                             | 6.0, 80°C          | 0.4                    |                       |                                        | (12)              |
| <b><i>Lactobacillus acidophilus</i> NCFM</b>                                                    | <b>5.0, 37°C</b>   | <b>0.05±0.004</b>      | <b>518.4±10.5</b>     | <b>10368</b>                           | <b>This study</b> |
| <i>Paenibacillus barengoltzi</i>                                                                | 5.5, 50°C          | 2.94                   |                       |                                        | (13)              |
| <i>Paenibacillus polymyxa</i> Nws-pp2                                                           | 6.0, 35°C          | 15.25                  |                       |                                        | (14)              |
| <i>Bacillus cereus</i> Nws-bc5                                                                  | 7.0, 40°C          | 0.45                   |                       |                                        | (15)              |
| <i>Bacillus megaterium</i> WW1210                                                               | 6.5, 55°C          | 3.3±0.25               |                       |                                        | (16)              |
| <i>Bacillus naganoensis</i>                                                                     | 4.5, 60°C          | 1.22±0.11              | 0.72±0.01             | 0.59                                   | (17)              |
| <i>Bacillus</i> sp. AN-7                                                                        | 6, 80°C            | 1.3                    |                       |                                        | (18)              |
| <i>Bacillus</i> sp. S-1                                                                         | 9.0, 50°C          | 7.92                   |                       |                                        | (19)              |
| <i>Thermoanaerobacter thermohydrosulfuricus</i><br>( <i>Clostridium thermohydrosulfuricum</i> ) | 6.0, 60°C          | 0.675                  | 271                   | 410                                    | (20)              |
| <i>Exiguobacterium acetylium</i> a1/YH5                                                         | 6.0, 50°C          | 0.12±0.02              |                       |                                        | (21)              |
| <i>Lactococcus lactis</i> IBB 500                                                               | 4.5, 60°C          | 0.34±0.02              |                       |                                        | (22)              |
| Oat ( <i>Avena sativa</i> )                                                                     | 5.0, 30°C          | 0.17                   |                       |                                        | (23)              |
| <i>Sorghum bicolor</i>                                                                          | 5.0, 30°C          | 0.2                    |                       |                                        | (24)              |
| Sugar beet ( <i>Beta vulgaris</i> var. <i>altissima</i> )                                       | 5.6, 37°C          | 0.31                   |                       |                                        | (25)              |
| <i>Thermus caldophilus</i> GK-24                                                                | 7.0, 73°C          | 0.42                   |                       |                                        | (26)              |
| <b>POTATO AMYLOPECTIN</b>                                                                       |                    |                        |                       |                                        |                   |
| Barley ( <i>Hordeum vulgare</i> )                                                               | 5.5, 37°C          | 6.9±1.0                | 15.6±1.2              | 2.3                                    | (27)              |
| <i>Klebsiella pneumoniae</i>                                                                    | 5.5, 40°C          | 10.1                   | 14.1                  |                                        | (3)               |
| Rice ( <i>Oryza sativa</i> L. <i>japonica</i> )                                                 | 6.0, 37°C          | 1.538                  |                       |                                        | (5)               |
| Spinach ( <i>Spinacia oleracea</i> )                                                            | 6.0, 37°C          | 7                      |                       |                                        | (6, 7)            |
| <b><i>Lactobacillus acidophilus</i> NCFM</b>                                                    | <b>5.0, 37°C</b>   | <b>0.37±0.041</b>      | <b>24.9±0.7</b>       | <b>67</b>                              | <b>This study</b> |
| <i>Bacillus megaterium</i> WW1210                                                               | 6.5, 55°C          | 3.6±0.18               |                       |                                        | (16)              |
| <i>Bacillus</i> sp. S-1                                                                         | 9.0, 50°C          | 1.63                   |                       |                                        | (19)              |
| Broad bean ( <i>Vicia faba</i> L.)                                                              | 30°C               | 1.2                    |                       |                                        | (28)              |
| Oat ( <i>Avena sativa</i> )                                                                     | 5.0, 30°C          | 1.4                    |                       |                                        | (23)              |
| Sugar beet ( <i>Beta vulgaris</i> var. <i>altissima</i> )                                       | 5.6, 37°C          | 4.55                   |                       |                                        | (25)              |
| <b>AMYLOPECTIN <math>\beta</math>-LIMIT DEXTRIN</b>                                             |                    |                        |                       |                                        |                   |
| Broad bean ( <i>Vicia faba</i> L.)                                                              | 30°C               | 1                      |                       |                                        | (28)              |
| <i>Sorghum bicolor</i>                                                                          | 5.0, 37°C          | 2.5                    |                       |                                        | (24)              |
| <b><i>Lactobacillus acidophilus</i> NCFM</b>                                                    | <b>5.0, 37°C</b>   | <b>0.20±0.090</b>      | <b>189±15.8</b>       | <b>945</b>                             | <b>This study</b> |

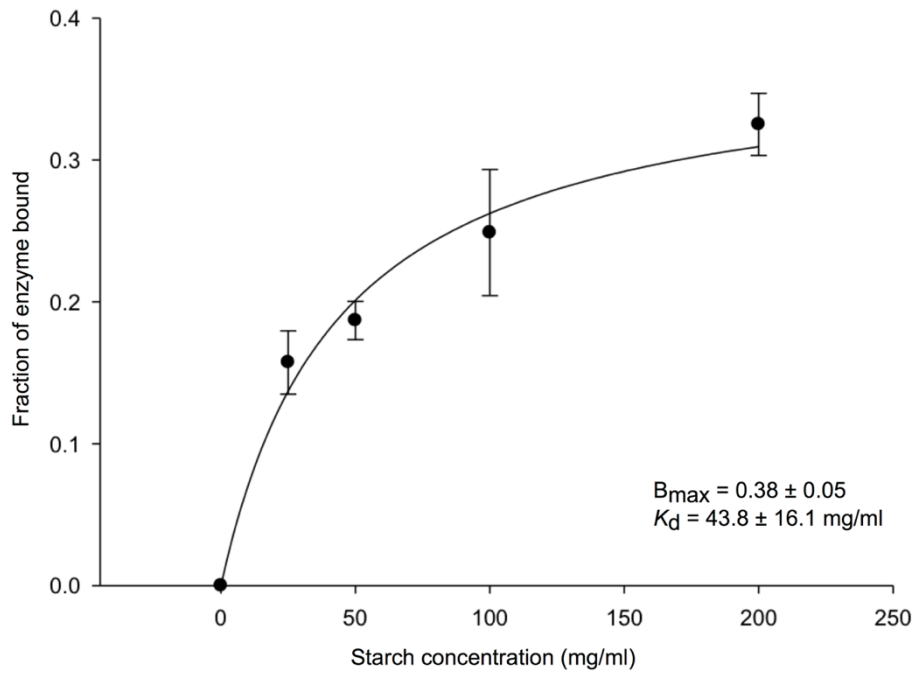

**Fig. S1.** Binding of *LaPul13\_14* to starch granules. The data is from four replicate experiments. The solid line is the fit of a one binding site model to the data, with the  $B_{\max}$  and the  $K_d$  as the maximum binding capacity and dissociation constant, respectively.

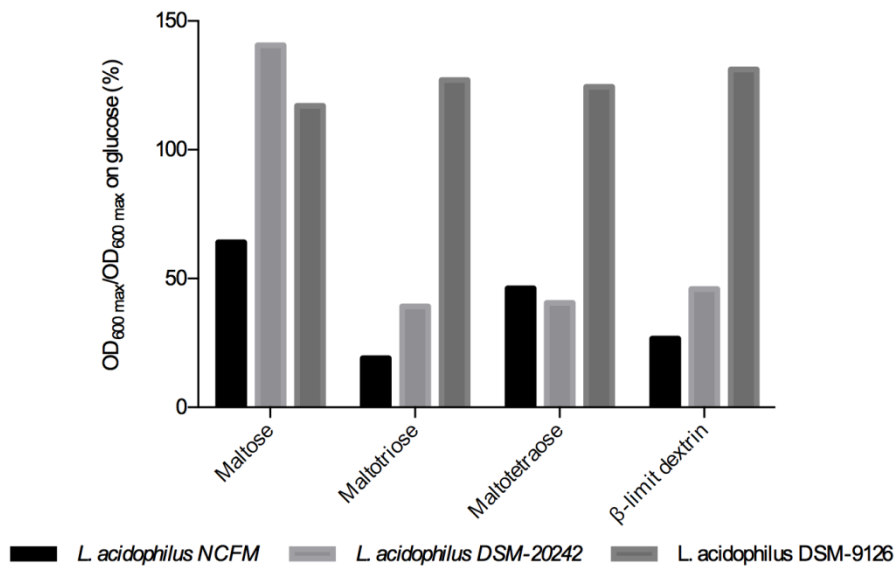

**Fig. S2.** Maximal growth of three *L. acidophilus* strains on maltooligosaccharides and  $\beta$ -limit dextrin relative to the maximal growth on glucose. *L. acidophilus* NCFM and *L. acidophilus* DSM-20242 have a comparable maltooligosaccharides utilization gene cluster, *i.e.* they have a transposase included in the cluster. The *L. acidophilus* DSM-9126 does not have a transposase in its maltooligosaccharides utilization gene cluster, and is likely to have an intact expression of the ATP-binding cassette transporter.

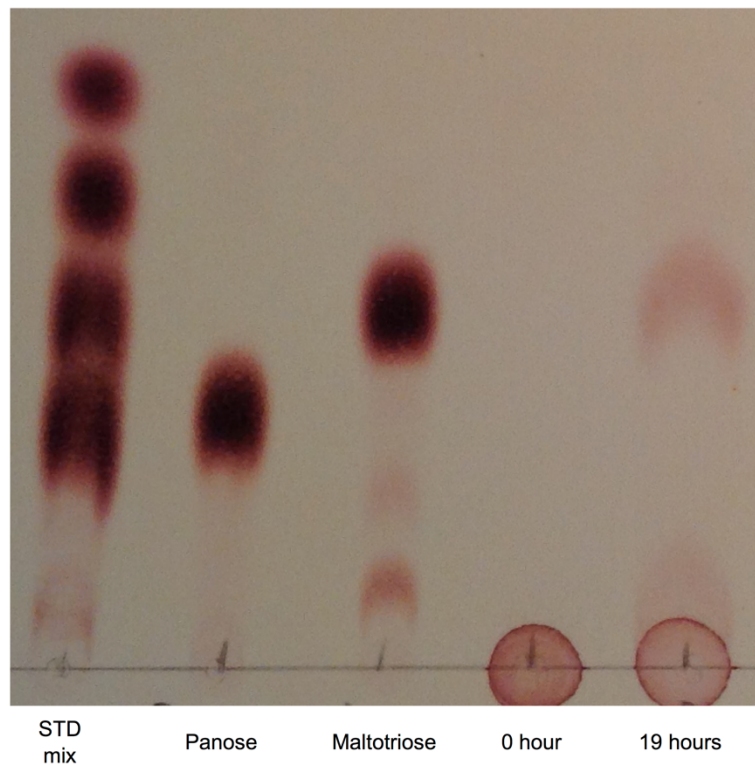

**Fig. S3.** Thin layer chromatography analysis of the degradation product from whole cell assay with pullulan. The standard mix (STD mix) consists of 20 mM of (mentioned from the top); glucose, maltose, maltotriose and panose. Furthermore, 20 mM panose and 20 mM maltotriose were spotted separately. The plate clearly shows the exclusive release of maltotriose after 19 h (first lane on the right side of the plate), confirming the pullulanase activity.

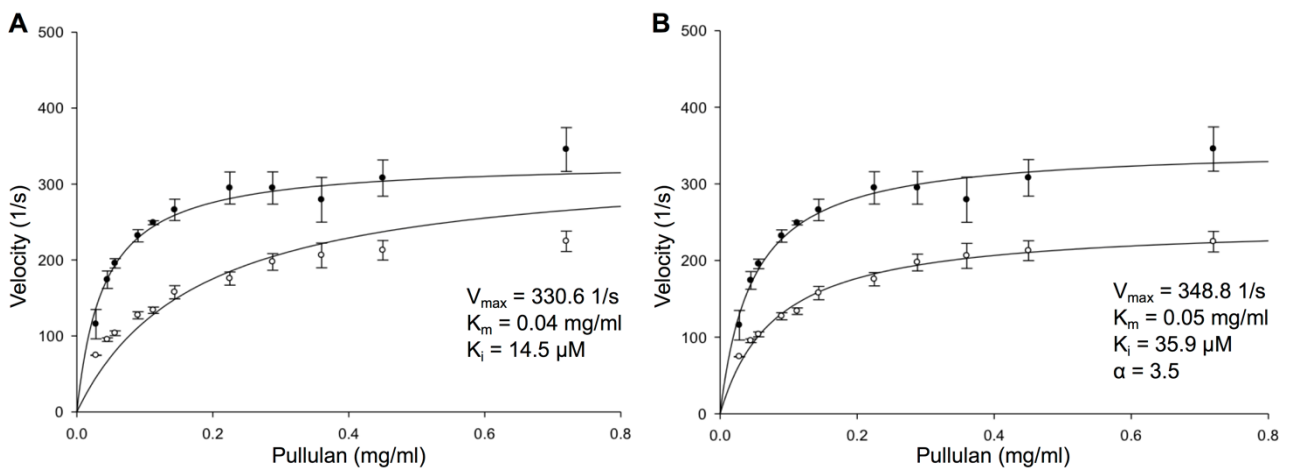

**Fig. S4.** Inhibition kinetics of *LaPul13\_14* on pullulan by  $\beta$ -cyclodextrin (50  $\mu\text{M}$ ). Two different inhibition models are shown. The solid and hollow circles represent the initial rates in the absence and the presence of  $\beta$ -cyclodextrin, respectively. The solid lines represent the fit to: (A) a competitive inhibition model and (B) mixed inhibition model. The competitive inhibition model results in systematic poor fits to the data, whereas the data is well modelled by a mixed inhibition model, which is the best model also as compared to a non-competitive inhibition model (not shown).

## REFERENCES:

1. **Petersen TN, Brunak S, von Heijne G, Nielsen H.** 2011. SignalP 4.0: discriminating signal peptides from transmembrane regions. *Nat Methods* **8**:785–786.
2. **Vester-Christensen MB, Abou Hachem M, Naested H, Svensson B.** 2010. Secretory expression of functional barley limit dextrinase by *Pichia pastoris* using high cell-density fermentation. *Protein Expr Purif* **69**:112–119.
3. **Yokobayashi K, Akai H, Sugimoto T, Hirao M, Sugimoto K, Harada T.** 1973. Comparison of the kinetic parameters of *Pseudomonas* isoamylase and *Aerobacter* pullulanase. *Biochim Biophys Acta* **293**:197–202.
4. **Malle D, Itoh T, Hashimoto W, Murata K, Utsumi S, Mikami B.** 2006. Overexpression, purification and preliminary X-ray analysis of pullulanase from *Bacillus subtilis* strain 168. *Acta Crystallogr Sect F Struct Biol Cryst Commun* **62**:381–384.
5. **Yamasaki Y, Nakashima S, Konno H.** 2008. Pullulanase from rice endosperm. *Acta Biochim Pol* **55**:507–510.
6. **Ludwig I, Ziegler P, Beck E.** 1984. Purification and properties of spinach leaf debranching enzyme. *Plant Physiol* **74**:856–861.
7. **Renz A, Schikora S, Schmid R, Kossmann J, Beck E.** 1998. cDNA sequence and heterologous expression of monomeric spinach pullulanase: multiple isomeric forms arise from the same polypeptide. *Biochem J* **331**:937–945.
8. **Bertoldo C, Armbrecht M, Becker F, Scha T, Antranikian G, Liebl W.** 2004. Cloning, sequencing, and characterization of a heat- and alkali-stable type I pullulanase from *Anaerobranca gottschalkii*. *Appl Environ Microbiol* **70**:3407–3416.
9. **Singh RS, Saini GK, Kennedy JF.** 2010. Maltotriose syrup preparation from pullulan using pullulanase. *Carbohydr Polym* **80**:401–407.
10. **Duan X, Chen J, Wu J.** 2013. Improving the thermostability and catalytic efficiency of *Bacillus deramificans* pullulanase by site-directed mutagenesis. *Appl Environ Microbiol* **79**:4072–4077.
11. **Rajaei S, Heidari R, Zahiri HS, Sharifzadeh S, Torktaz I, Noghabi KA.** 2014. A novel cold-adapted pullulanase from *Exiguobacterium* sp. SH3: Production optimization, purification, and characterization. *Starch - Stärke* **66**:225–234.
12. **Bertoldo C, Duffner F, Jorgensen PL, Antranikian G.** 1999. Pullulanase type I from *Fervidobacterium pennavorans* Ven5: cloning, sequencing, and expression of the gene and biochemical characterization of the recombinant enzyme. *Appl Environ Microbiol* **65**:2084–2091.
13. **Liu J, Liu Y, Yan F, Jiang Z, Yang S, Yan Q.** 2016. Gene cloning, functional expression and characterisation of a novel type I pullulanase from *Paenibacillus barengoltzii* and its application in resistant starch production. *Protein Expr Purif* **121**:22–30.
14. **Wei W, Ma J, Chen S-Q, Cai X-H, Wei D-Z.** 2015. A novel cold-adapted type I pullulanase of *Paenibacillus polymyxa* Nws-pp2: in vivo functional expression and biochemical characterization of glucans hydrolyzates analysis. *BMC Biotechnol* **15**:1–13.
15. **Wei W, Ma J, Guo S, Wei DZ.** 2014. A type I pullulanase of *Bacillus cereus* Nws-bc5 screening from

stinky tofu brine: Functional expression in *Escherichia coli* and *Bacillus subtilis* and enzyme characterization. *Process Biochem* **49**:1893–1902.

16. **Yang S, Yan Q, Bao Q, Liu J, Jiang Z.** 2016. Expression and biochemical characterization of a novel type I pullulanase from *Bacillus megaterium*. *Biotechnol Lett*.
17. **Chang M, Chu X, Lv J, Li Q, Tian J, Wu N.** 2016. Improving the thermostability of acidic pullulanase from *Bacillus naganoensis* by rational design. *PLoS One* **11**:e0165006.
18. **Kunamneni A, Singh S.** 2006. Improved high thermal stability of pullulanase from a newly isolated thermophilic *Bacillus* sp. AN-7. *Enzyme Microb Technol* **39**:1399–1404.
19. **Kim C-H, Choi H-I, Lee D-S.** 1993. Purification and biochemical properties of an alkaline pullulanase from alkalophilic *Bacillus* sp. S-1. *Biosci Biotechnol Biochem* **57**:1632–1637.
20. **Saha BC, Mathupala SP, Zeikus JG.** 1988. Purification and characterization of a highly thermostable novel pullulanase from *Clostridium thermohydrosulfuricum*. *Biochem J* **252**:343–348.
21. **Qiao Y, Peng Q, Yan J, Wang H, Ding H, Shi B.** 2015. Gene cloning and enzymatic characterization of alkali-tolerant type I pullulanase from *Exiguobacterium acetylicum*. *Lett Appl Microbiol* **60**:52–59.
22. **Waśko A, Polak-Berecka M, Targonski Z.** 2011. Purification and characterization of pullulanase from *Lactococcus lactis*. *Prep Biochem Biotechnol* **41**:252–261.
23. **Dunn G, Manners DJ.** 1975. The limit dextrinases from ungerminated oats (*Avena sativa* L) and ungerminated rice (*Oryza sativa* L). *Carbohydr Res* **39**:283–293.
24. **Hardie DG, Manners DJ, Yellowlees D.** 1976. The limit dextrinase from malted sorghum (*Sorghum vulgare*). *Enzyme* **50**:75–85.
25. **Masuda H, Takahashi T, Sugawara S.** 1987. Purification and properties of starch hydrolyzing enzymes in mature roots of sugar beets. *Plant Physiol* **84**:361–365.
26. **Kim CH, Nashiru O, Ko JH.** 1996. Purification and biochemical characterization of pullulanase type I from *Thermus caldophilus* GK-24. *FEMS Microbiol Lett* **138**:147–152.
27. **Møller MS, Windahl MS, Sim L, Bøjstrup M, Abou Hachem M, Hindsgaul O, Palcic M, Svensson B, Henriksen A.** 2015. Oligosaccharide and substrate binding in the starch debranching enzyme barley limit dextrinase. *J Mol Biol* **427**:1263–1277.
28. **Gordon RW, Manners DJ, Stark JR.** 1975. The limit dextrinase of the broad bean (*Vicia faba* L). *Carbohydr Res* **42**:125–134.
